# Supplementary material for: Prenatal Secondhand Smoke Exposure and Infant Birth Weight in China
Source: MDPI journal article supplement (doi:10.3390/ijerph9103398), 2012-09-26
Supplement: s1 [file s1]

*Supplementary Information*

## **Prenatal Secondhand Smoke Exposure and Infant Birth Weight in China**

**Nora L. Lee**<sup>1,2,\*</sup>, **Jonathan M. Samet**<sup>1,3</sup>, **Gonghuan Yang**<sup>4</sup>, **Maigeng Zhou**<sup>5</sup>, **Jie Yang**<sup>6</sup>,  
**Adolfo Correa**<sup>7</sup> and **Peter S. J. Lees**<sup>8</sup>

<sup>1</sup> Department of Epidemiology, Bloomberg School of Public Health, Johns Hopkins University, Baltimore, MD 21205, USA; E-Mail: jsamet@usc.edu

<sup>2</sup> Department of Epidemiology and Biostatistics, School of Public Health, Drexel University, Philadelphia, PA 19102, USA

<sup>3</sup> Department of Preventive Medicine, Keck School of Medicine and USC Institute for Global Health, University of Southern California, Los Angeles, CA 90089, USA

<sup>4</sup> Chinese Center for Disease Control and Prevention, Beijing 100050, China; E-Mail: Yangghuan@vip.sina.com

<sup>5</sup> Center for Public Health Surveillance and Information Service, Chinese Center for Disease Control and Prevention, Beijing 100050, China; E-Mail: maigengzhou@hotmail.com

<sup>6</sup> National Tobacco Control Office, Chinese Center for Disease Control and Prevention, Beijing 100050, China; E-Mail: jlccyangjie@yahoo.com.cn

<sup>7</sup> Department of Medicine, University of Mississippi Medical Center, Jackson, MS 39213, USA; E-Mail: acorrea@umc.edu

<sup>8</sup> Department of Environmental Health Sciences, Bloomberg School of Public Health, Johns Hopkins University, Baltimore, MD 21205, USA; E-Mail: plees@jhsph.edu

\* Author to whom correspondence should be addressed; E-Mail: nlee@drexel.edu; Tel.: +1-215-762-4946; Fax: +1-215-762-1174.

---

## Appendix

**DATA COLLECTION FORM**  
**For Study on Pregnant Women and Their Newborns**

*Conducted By*  
 Johns Hopkins University  
 Chinese Academy of Preventive Medicine  
 and  
 Norman Bethune University of Medical Sciences

**DONGCHENG OBSTETRICAL HOSPITAL**

Name of Interviewer: \_\_\_\_\_

Subject Identification Number:  $\frac{1}{1} \frac{0}{2} \frac{\quad}{3} \frac{\quad}{4} \frac{\quad}{5}$

Patient's Medical Record Number: \_\_\_\_\_

Date of Interview: \_\_\_\_\_ - \_\_\_\_\_ - \_\_\_\_\_  
 24 25                  26 27                  28 29  
 year                          month                          day

**BEIJING OBSTETRICAL AND GYNECOLOGICAL HOSPITAL**

Name of Interviewer: \_\_\_\_\_

Subject Identification Number:  $\frac{2}{1} \frac{0}{2} \frac{\quad}{3} \frac{\quad}{4} \frac{\quad}{5}$

Patient's Medical Record Number: \_\_\_\_\_

Date of Interview: \_\_\_\_\_ - \_\_\_\_\_ - \_\_\_\_\_  
 24 5                          26 27                          28 29  
 year                          month                          day

**COOPERATIVE HOSPITAL**

Name of Interviewer: \_\_\_\_\_

Subject Identification Number:  $\frac{3}{1} \frac{0}{2} \frac{\quad}{3} \frac{\quad}{4} \frac{\quad}{5}$

Patient's Medical Record Number: \_\_\_\_\_

Date of Interview: \_\_\_\_\_ - \_\_\_\_\_ - \_\_\_\_\_  
 24 25                  26 27                  28 29  
 year                          month                          day

## INTERVIEW WITH MOTHER

## Section 1. Eligibility and Demographics

- |                                                                                       |    |
|---------------------------------------------------------------------------------------|----|
| 1. DO YOU LIVE IN BEIJING?                                                            | 30 |
| 0. No                                                                                 |    |
| 1. Yes                                                                                |    |
| 9. Do not know / No answer                                                            |    |
| 2. DID YOU EVER SMOKE CIGARETTES?                                                     | 31 |
| 0. No, never smoked before                                                            |    |
| 1. Yes, but stopped smoking before pregnancy                                          |    |
| 2. Yes, but stopped smoking during pregnancy                                          |    |
| 3. Yes, now smoke on average less than 1 cigarette/day                                |    |
| 4. Yes, now smoke on average 1 or more cigarettes/day                                 |    |
| 9. Do not know / No answer                                                            |    |
| 3. WHAT IS THE HIGHEST GRADE OR YEAR OF SCHOOL <u>YOU</u> HAVE COMPLETED?             | 32 |
| 0. No education / Illiterate                                                          |    |
| 1. Elementary school                                                                  |    |
| 2. Junior middle school                                                               |    |
| 3. Senior middle school                                                               |    |
| 4. University and higher                                                              |    |
| 9. Do not know / No answer                                                            |    |
| 4. WHAT IS THE HIGHEST GRADE OR YEAR OF SCHOOL <u>YOUR HUSBAND</u> HAS COMPLETED?     | 33 |
| 0. No education / Illiterate                                                          |    |
| 1. Elementary school                                                                  |    |
| 2. Junior middle school                                                               |    |
| 3. Senior middle school                                                               |    |
| 4. University and higher                                                              |    |
| 9. Do not know / No answer                                                            |    |
| 5. HOW MANY PEOPLE ARE IN YOUR FAMILY THAT LIVE AND EAT WITH YOU, INCLUDING YOURSELF? | 34 |
| _____ (Enter. one number)                                                             | 35 |
| 6. HOW MUCH IS YOUR FAMILY'S TOTAL MONTHLY INCOME?                                    | 36 |
| 0. less than 500 yuan                                                                 |    |
| 1. 500 yuan–999 yuan                                                                  |    |
| 2. 1,000 yuan–2,499 yuan                                                              |    |
| 3. 2,500 yuan–3,999 yuan                                                              |    |
| 4. 4,000 yuan–5,499 yuan                                                              |    |
| 5. 5,500 yuan or more                                                                 |    |
| 9. Do not know / No answer                                                            |    |

7. WHEN YOU WERE PREGNANT, HOW MANY DAYS EACH WEEK WERE YOU AROUND ANYONE FOR MORE THAN 15 MINUTES EACH DAY WHO WAS SMOKING? (Read. choices 0–4)

0. Never
1. Less than 1 day each week
2. 1–3 days each week
3. More than 3 days each week
4. Almost every day
9. Do not know / No answer

37

## Section 2. Home Exposure Levels

8. AT HOME, HOW MANY HOURS EACH DAY WERE YOU AROUND YOUR HUSBAND WHEN HE WAS SMOKING DURING YOUR . . .

. . . 1st TRIMESTER?

98. Husband did not smoke at home  
Average hours per day: \_\_\_\_\_
99. Do not know / No answer

38  
39

. . . 2nd TRIMESTER?

98. Husband did not smoke at home  
Average hours per day: \_\_\_\_\_
99. Do not know / No answer

40  
41

. . . 3rd TRIMESTER?

98. Husband did not smoke at home  
Average hours per day: \_\_\_\_\_
99. Do not know / No answer

42  
43

9. AT HOME, HOW MANY CIGARETTES DID YOUR HUSBAND SMOKE EACH DAY INSIDE YOUR HOME DURING YOUR . . .

. . . 1st TRIMESTER?

98. Husband did not smoke at home  
Average number of cigarettes: \_\_\_\_\_
99. Do not know / No answer

44  
45

. . . 2nd TRIMESTER?

98. Husband did not smoke at home  
Average number of cigarettes: \_\_\_\_\_
99. Do not know / No answer

46  
47

. . . 3rd TRIMESTER?

98. Husband did not smoke at home  
Average number of cigarettes: \_\_\_\_\_
99. Do not know / No answer

48  
49

10. AT HOME, HOW MANY HOURS EACH DAY WERE YOU AROUND YOUR OTHER FAMILY MEMBERS WHEN THEY WERE SMOKING DURING YOUR . . .

. . . 1st TRIMESTER?

98. Other family members did not smoke at home

Average hours per day: \_\_\_\_\_

99. Do not know / No answer

\_\_\_\_\_ 50

51

. . . 2nd TRIMESTER?

98. Other family members did not smoke at home

Average hours per day: \_\_\_\_\_

99. Do not know / No answer

\_\_\_\_\_ 52

53

. . . 3rd TRIMESTER?

98. Other family members did not smoke at home

Average hours per day: \_\_\_\_\_

99. Do not know / No answer

\_\_\_\_\_ 54

55

11. HOW MANY HOURS EACH DAY WERE YOU VISITING OTHER PEOPLE OR AROUND VISITORS OR GUESTS WHEN THEY WERE SMOKING DURING YOUR . . .

. . . 1st TRIMESTER?

98. They did not smoke in the homes

Average hours per day: \_\_\_\_\_

99. Do not know / No answer

\_\_\_\_\_ 56

57

. . . 2nd TRIMESTER?

98. They did not smoke in the homes

Average hours per day: \_\_\_\_\_

99. Do not know / No answer

\_\_\_\_\_ 58

59

. . . 3rd TRIMESTER?

98. They did not smoke in the homes

Average hours per day: \_\_\_\_\_

99. Do not know / No answer

\_\_\_\_\_ 60

61

12. HOW MANY ROOMS DOES YOUR HOME HAVE, INCLUDING THE KITCHEN (IF SEPARATE ROOM WITH DOOR) BUT EXCLUDING BATHROOMS AND CLOSETS?

\_\_\_\_\_ (Enter. one number)

99. Do not know / No answer

\_\_\_\_\_ 62

63

|                                                                                                           |        |
|-----------------------------------------------------------------------------------------------------------|--------|
| 13. WHEN SOMEONE IS SMOKING IN YOUR HOME, HOW OFTEN DO YOU OPEN THE WINDOWS OR DOORS? (Read. choices 0–5) | _____  |
| 0. No smoking in the home                                                                                 | 64     |
| 1. Never                                                                                                  |        |
| 2. Seldom                                                                                                 |        |
| 3. Sometimes                                                                                              |        |
| 4. Often                                                                                                  |        |
| 5. Always                                                                                                 |        |
| 9. Do not know / No answer                                                                                |        |
| 14. DO YOU HAVE AIR CONDITIONING IN YOUR HOME?                                                            | _____  |
| 0. No                                                                                                     | 65     |
| 1. Yes                                                                                                    |        |
| 9. Do not know / No answer                                                                                |        |
| 15. WHAT TYPE OF HEATING DO YOU HAVE IN YOUR HOME?                                                        | _____  |
| 0. Electricity                                                                                            | 66     |
| 1. Gas heating                                                                                            |        |
| 2. Stove                                                                                                  |        |
| 3. Other (specify): _____                                                                                 | 67–84  |
| 9. Do not know / No answer                                                                                |        |
| 16. WHAT TYPE OF FUEL DO YOU USE MOST OFTEN FOR COOKING?                                                  | _____  |
| 0. Electricity                                                                                            | 85     |
| 1. Natural gas                                                                                            |        |
| 2. Wood                                                                                                   |        |
| 3. Coal                                                                                                   |        |
| 4. Other (specify): _____                                                                                 | 86–103 |
| 9. Do not know / No answer                                                                                |        |

### Section 3. Work Exposure Levels

|                                                                                                                                             |       |
|---------------------------------------------------------------------------------------------------------------------------------------------|-------|
| 17. DID YOU WORK WHILE YOU WERE PREGNANT?                                                                                                   | _____ |
| 0. No (If “No,” check “Did not work” for questions 18–21)                                                                                   | 104   |
| 1. Yes                                                                                                                                      |       |
| 9. Do not know / No answer                                                                                                                  |       |
| 18. AT WORK, HOW OFTEN WERE YOU AROUND ANYONE FOR MORE THAN 15 MINUTES EACH DAY WHO WAS SMOKING WHEN YOU WERE PREGNANT? (Read. choices 0–4) | _____ |
| 0. Did not work                                                                                                                             | 105   |
| 1. Less than 1 day each week                                                                                                                |       |
| 2. 1–3 days each week                                                                                                                       |       |
| 3. More than 3 days each week                                                                                                               |       |
| 4. Almost every day                                                                                                                         |       |
| 9. Do not know / No answer                                                                                                                  |       |

19. ON AVERAGE, HOW MANY PEOPLE SMOKED NEAR YOU AT WORK WHEN YOU WERE PREGNANT?

98. Did not work

\_\_\_\_\_ (Enter one number)

99. Do not know / No answer

\_\_\_\_\_  
106  
107

20. WHERE DID YOU WORK MOST OF THE DAY? (Read choices 1–4)

0. Did not work

1. In an office or room with other people

HOW MANY OTHER PEOPLE WORK IN YOUR OFFICE OR ROOM? \_\_\_\_\_ (Enter one number)

2. Inside a building, but did not stay in one room

3. Outside

4. Other (specify): \_\_\_\_\_

9. Do not know / No answer

\_\_\_\_\_  
108

\_\_\_\_\_  
109  
110

111–126

21. ON AVERAGE, HOW MANY HOURS EACH WORK DAY WERE YOU AROUND SOMEONE AT WORK WHO WAS SMOKING DURING YOUR

...

... 1st TRIMESTER?

98. Did not work

Average hours per day: \_\_\_\_\_

99. Do not know / No answer

\_\_\_\_\_  
127  
128

... 2nd TRIMESTER?

98. Did not work

Average hours per day: \_\_\_\_\_

99. Do not know / No answer

\_\_\_\_\_  
129  
130

... 3rd TRIMESTER?

98. Did not work

Average hours per day: \_\_\_\_\_

99. Do not know / No answer

\_\_\_\_\_  
131  
132

#### Section 4. Public Exposure Levels

22. IN PUBLIC PLACES (NOT AT WORK) LIKE BUSES, RESTAURANTS OR PARKS, ON AVERAGE, HOW MANY HOURS EACH DAY WERE YOU AROUND SOMEONE WHO WAS SMOKING DURING YOUR ...

... 1st TRIMESTER?

98. Never

Average hours per day: \_\_\_\_\_

99. Do not know / No answer

\_\_\_\_\_  
133  
134

... 2nd TRIMESTER?

98. Never

Average hours per day: \_\_\_\_\_

99. Do not know / No answer

\_\_\_\_\_  
135  
136

... 3rd TRIMESTER?

98. Never

Average hours per day: \_\_\_\_\_

99. Do not know / No answer

\_\_\_\_\_ 137  
138

### Section 5. Knowledge and Attitudes

23. DO YOU THINK IT WOULD BE HARMFUL TO THE BABY IF A MOTHER SMOKED WHILE SHE WAS PREGNANT?

0. No

1. Yes

9. Do not know / No answer

\_\_\_\_\_ 139

24. WHAT DO YOU THINK WOULD BE THE EFFECT ON THE BABY IF THE MOTHER SMOKED DURING PREGNANCY?

0. No effect

1. Physical defect

2. Mental retardation or developmental delay

3. Miscarriage or low birth weight

4. Cancer

5. Other (specify): \_\_\_\_\_

9. Do not know / No answer

\_\_\_\_\_ 140

141–156

25. DO YOU THINK IT WOULD BE HARMFUL TO THE BABY IF OTHERS SMOKED AROUND THE MOTHER WHILE SHE WAS PREGNANT?

0. No

1. Yes

9. Do not know / No answer

\_\_\_\_\_ 157

26. WHAT DO YOU THINK WOULD BE THE EFFECT ON THE BABY IF OTHERS SMOKED AROUND THE MOTHER WHILE SHE WAS PREGNANT?

0. No effect

1. Physical defect

2. Mental retardation or developmental delay

3. Miscarriage or low birth weight

4. Cancer

5. Other (specify): \_\_\_\_\_

9. Do not know / No answer

\_\_\_\_\_ 158

159–174

27. DOES THE GOVERNMENT HAVE ANY POLICY TO BAN SMOKING IN PUBLIC PLACES?

0. No

1. Yes

9. Do not know / No answer

\_\_\_\_\_ 175



|                                                                                                          |         |
|----------------------------------------------------------------------------------------------------------|---------|
| 28. ARE THERE ANY EDUCATION PROGRAMS TO HELP PEOPLE STOP SMOKING?                                        | 176     |
| 0. No                                                                                                    |         |
| 1. Yes                                                                                                   |         |
| 9. Do not know / No answer                                                                               |         |
| 29. WHERE HAVE YOU SEEN OR HEARD INFORMATION ABOUT STOPPING SMOKING?                                     | 177     |
| 0. No policy or education program                                                                        |         |
| 1. Billboards or posters in public places                                                                |         |
| 2. Television or radio announcements                                                                     |         |
| 3. Newspaper or magazine announcements                                                                   |         |
| 4. From doctors or other health care workers                                                             |         |
| 5. Other (specify): _____                                                                                | 178–193 |
| 9. Do not know / No answer                                                                               |         |
| 30. DOES THE GOVERNMENT HAVE ANY POLICY TO STOP PEOPLE FROM SMOKING AROUND PREGNANT WOMEN?               | 194     |
| 0. No                                                                                                    |         |
| 1. Yes                                                                                                   |         |
| 9. Do not know / No answer                                                                               |         |
| 31. ARE THERE ANY EDUCATION PROGRAMS TO TEACH PEOPLE TO STOP SMOKING AROUND PREGNANT WOMEN?              | 195     |
| 0. No                                                                                                    |         |
| 1. Yes                                                                                                   |         |
| 9. Do not know / No answer                                                                               |         |
| 32. WHERE HAVE YOU SEEN OR HEARD INFORMATION ABOUT STOPPING SMOKING AROUND PREGNANT WOMEN?               | 196     |
| 0. No policy or education program                                                                        |         |
| 1. Billboards or posters in public places                                                                |         |
| 2. Television or radio announcements                                                                     |         |
| 3. Newspaper or magazine announcements                                                                   |         |
| 4. From doctors or other health care workers                                                             |         |
| 5. Other (specify): _____                                                                                | 197–213 |
| 9. Do not know / No answer                                                                               |         |
| 33. DID YOU TRY TO STOP YOUR HUSBAND FROM SMOKING AT HOME WHEN YOU WERE PREGNANT?                        | 214     |
| 0. No                                                                                                    |         |
| 1. Yes                                                                                                   |         |
| 9. Husband does not smoke at home / No answer                                                            |         |
| 34. DO YOU THINK PEOPLE SMOKING AROUND BABIES AND CHILDREN HAS ANY HEALTH EFFECT ON BABIES AND CHILDREN? | 215     |
| 0. No                                                                                                    |         |
| 1. Yes                                                                                                   |         |
| 9. Do not know / No answer                                                                               |         |

35. WHAT DO YOU THINK WOULD BE THE EFFECT ON BABIES AND CHILDREN IF OTHERS SMOKED AROUND THEM?

- 0. No effect
- 1. Lung problems
- 2. Ear problems
- 3. Brain problems
- 4. Stunted growth
- 5. Cancer
- 6. Other problems (specify): \_\_\_\_\_
- 9. Do not know / no answer

216

217-232

What was your weight when you first became pregnant?

\_\_\_\_\_.  
233 234 235

\_\_\_\_\_ kilograms

THESE ARE ALL THE QUESTIONS I HAVE. THANK YOU FOR YOUR TIME.

[END OF INTERVIEW]
